# Supplementary material for: Differences in proteome perturbations caused by the Wolbachia strain wAu suggest multiple mechanisms of Wolbachia-mediated antiviral activity
Source: PubMed Central journal article supplement (PMC10359319; doi:10.1038/s41598-023-38127-4), 2023-07-20
Supplement: 41598_2023_38127_MOESM1_ESM.pdf [file 41598_2023_38127_MOESM1_ESM.pdf]

1 **Supplementary data**

2 **Table S1** Comparison of wAu/wAlbA/wt proteomic analysis and wMel/wt analysis

3 Comparison of dysregulated proteins involved in Lipid metabolism and ER/protein unfolding response between  
 4 data sets. Numbers indicate the fold change when compared to the corresponding wt midgut data. Figures  
 5 greyed out represent those not found to be significant in a given dataset.  
 6

| <b>Lipid metabolism</b>                                                      | wMel <sup>1</sup> | wAu  | wAlbA |
|------------------------------------------------------------------------------|-------------------|------|-------|
| Niemann-Pick type C2 (AAEL015136)                                            | 2.30              | 0.36 | 0.60  |
| Niemann-Pick type C2 (AAEL009760)                                            | 2.06              | 0.99 | 1.27  |
| Sterol carrier protein 2-like 2                                              | 1.85              | 0.81 | 1.01  |
| Niemann-Pick type C1                                                         | 1.35              | 0.76 | 1.08  |
| Palmitoyltransferase                                                         | 1.33              | 0.90 | 1.05  |
| Lipid droplet associated hydrolase                                           | 1.33              | 0.95 | 1.19  |
| Sterol carrier protein 2-like 3 variant 1                                    | 1.27              | 0.77 | 0.66  |
| Putative oxysterol binding protein                                           | 1.24              | 1.02 | 1.02  |
| Phosphoacetylglucosamine mutase                                              | 1.21              | 0.92 | 1.02  |
| Putative cery long-chain acyl-coa synthetase/fatty acid transporter          | 1.17              | 0.95 | 1.10  |
| Glycerol-3-phosphate acyltransferase 3-like                                  | 1.15              | 0.86 | 1.04  |
| Putative 85kDa calcium-independent phospholipase a2                          | 1.13              | 0.88 | 0.95  |
| Putative lipid particle                                                      | 0.89              | 1.13 | 1.11  |
| Sterol carrier protein-X                                                     | 0.88              | 1.38 | 1.20  |
| Acyl-coenzyme A oxidase                                                      | 0.88              | 0.99 | 0.99  |
| Putative fatty acid desaturase                                               | 0.82              | 0.93 | 0.92  |
| <b>ER/unfolded protein response</b>                                          | wMel <sup>1</sup> | wAu  | wAlbA |
| Vacuolar ATPase assembly integral membrane protein                           | 1.36              | n/a  | n/a   |
| Alpha-glucosidase                                                            | 1.26              | 0.98 | 0.97  |
| Dolichyl-diphosphooligosaccharide--protein glycosyltransferase subunit stt3b | 1.21              | 0.82 | 1.08  |
| Olichyl-diphosphooligosaccharide--protein glycosyltransferase dub unit DAD1  | 1.21              | 1.08 | 1.15  |
| tRNA-splicing ligase RtcB                                                    | 1.20              | 0.86 | 1.04  |
| Putative mannose lectin ergic-53                                             | 1.16              | 0.99 | 1.05  |
| Putative yip1                                                                | 1.16              | 0.91 | 0.97  |
| Reticulon-like protein                                                       | 1.16              | 0.79 | 1.02  |
| Putative proteasome non-atpase 26s subunit                                   | 1.13              | 1.03 | 0.79  |
| Putative sec23-binding domain of sec16                                       | 1.12              | 0.99 | 1.04  |
| Heat shock protein                                                           | 1.11              | 1.13 | 1.11  |
| Peptidylprolyl isomerase                                                     | 1.09              | 0.90 | 1.01  |
| Putative transport and Golgi organisation protein 1                          | 1.09              | 0.90 | 1.01  |
| Gp210                                                                        | 0.91              | 1.09 | 1.01  |

7

8

9

10

11

12

13

14

15

16

17

18  
19  
20  
21  
22  
23  
24

**Table S2 RBPs significantly dysregulated in *w*Au midguts compared to *Wolbachia*-free midguts.**

Proteins significantly dysregulated in *w*Au midguts, identified as RBPs through comparison to RIC dataset are shown. Those already known to bind DENV RNA are highlighted. Permutation Test Benjamini-Hochberg

| AlternateA1:45 ID | (p < 0.01559)(wAu / WT) | Log2Fold Change (wAu / WT) | (p < 0.01352)(wAlbA / WT) | Log2 Fold Change (wAlbA / WT) | (p < 0.01334)(wt / wMel) | Log2 Fold Change(wmel / wt) | Known to bind DENV            |
|-------------------|-------------------------|----------------------------|---------------------------|-------------------------------|--------------------------|-----------------------------|-------------------------------|
| AAEL004978+A2:A94 | 0.0001                  | -0.55                      | 0.00025                   | -0.5                          | 0.001                    | -0.25                       |                               |
| AAEL003835        | 0.0001                  | -0.21                      | 0.57                      | -0.02                         | 0.0001                   | 0.27                        |                               |
| AAEL003916        | 0.0001                  | -0.2                       | 0.23                      | -0.04                         | 0.002                    | 0.21                        |                               |
| AAEL013139        | 0.0001                  | -0.18                      | 0.00077                   | -0.11                         | x                        | x                           |                               |
| AAEL000944        | 0.008                   | -0.08                      | 0.66                      | 0                             | x                        | x                           |                               |
| AAEL012585        | 0.00041                 | 0.05                       | 0.001                     | -0.05                         | 0.0001                   | -0.2                        |                               |
| AAEL001421        | 0.004                   | 0.05                       | 0.98                      | 0                             | x                        | x                           | Binds DENV and ZIKV in humans |
| AAEL005722        | 0.001                   | 0.06                       | 0.0087                    | -0.05                         | 0.0001                   | -0.13                       | Binds DENV NS5                |
| AAEL006577        | 0.009                   | 0.07                       | 0.0001                    | 0.14                          | x                        | x                           |                               |
| AAEL006794        | 0.00059                 | 0.07                       | 0.0001                    | 0.11                          | x                        | x                           |                               |
| AAEL012686        | 0.003                   | 0.07                       | 0.084                     | 0                             | x                        | x                           |                               |
| AAEL013249        | 0.003                   | 0.08                       | 0.0001                    | 0.12                          | 0.0001                   | 0.14                        |                               |
| AAEL009326        | 0.013                   | 0.08                       | 0.0001                    | 0.15                          | x                        | x                           |                               |
| AAEL013359        | 0.004                   | 0.08                       | 0.004                     | -0.05                         | 0.009                    | -0.07                       |                               |
| AAEL010018        | 0.001                   | 0.08                       | 0.1                       | 0.03                          | x                        | x                           |                               |
| AAEL002488        | 0.001                   | 0.09                       | 0.0001                    | 0.11                          | 0.0001                   | 0.22                        |                               |
| AAEL001352        | 0.0001                  | 0.09                       | 0.002                     | -0.04                         | x                        | x                           |                               |
| AAEL009859        | 0.00083                 | 0.09                       | 0.027                     | 0.05                          | 0.008                    | 0.07                        |                               |
| AAEL009151        | 0.003                   | 0.09                       | 0.22                      | 0.01                          | x                        | x                           |                               |
| AAEL011447        | 0.00051                 | 0.09                       | 0.55                      | 0.03                          | x                        | x                           |                               |
| AAEL009496        | 0.00022                 | 0.09                       | 0.025                     | -0.05                         | 0.0001                   | -0.24                       |                               |
| AAEL008248        | 0.001                   | 0.1                        | 0.003                     | 0.11                          | x                        | x                           |                               |
| AAEL011698        | 0.002                   | 0.1                        | 0.0001                    | 0.14                          | x                        | x                           |                               |
| AAEL008073        | 0.00087                 | 0.1                        | 0.12                      | 0.11                          | 0.008                    | 0.08                        |                               |
| AAEL000750        | 0.00044                 | 0.1                        | 0.093                     | 0.05                          | x                        | x                           |                               |
| AAEL001166        | 0.001                   | 0.1                        | 0.24                      | -0.04                         | x                        | x                           |                               |
| AAEL004699        | 0.0001                  | 0.11                       | 0.001                     | -0.02                         | 0.0001                   | -0.13                       | binds DENV RNA                |
| AAEL008220        | 0.00056                 | 0.11                       | 0.00018                   | -0.1                          | 0.011                    | -0.13                       |                               |
| AAEL011282        | 0.005                   | 0.11                       | 0.0001                    | -0.1                          | 0.0001                   | -0.24                       | prM DENV binding              |
| AAEL005947        | 0.00038                 | 0.11                       | 0.004                     | -0.04                         | x                        | x                           |                               |
| AAEL005744        | 0.0001                  | 0.11                       | 0.7                       | -0.02                         | x                        | x                           |                               |
| AAEL010248        | 0.00074                 | 0.11                       | 0.12                      | -0.02                         | x                        | x                           |                               |
| AAEL013968        | 0.0001                  | 0.12                       | 0.011                     | 0.05                          | x                        | x                           | binds DENV RNA                |
| AAEL003514        | 0.001                   | 0.12                       | 0.01                      | -0.08                         | x                        | x                           |                               |
| AAEL013982        | 0.0001                  | 0.12                       | 0.56                      | 0.02                          | x                        | x                           |                               |
| AAEL005629        | 0.002                   | 0.12                       | 0.17                      | -0.01                         | 0.002                    | -0.16                       |                               |
| AAEL001037        | 0.001                   | 0.12                       | 0.21                      | -0.05                         | x                        | x                           |                               |
| AAEL003385        | 0.003                   | 0.13                       | 0.007                     | 0.16                          | x                        | x                           |                               |
| AAEL004415        | 0.001                   | 0.13                       | 0.93                      | -0.02                         | x                        | x                           |                               |
| AAEL009309        | 0.0017                  | 0.13                       | 0.064                     | -0.08                         | x                        | x                           |                               |
| AAEL009287        | 0.0065                  | 0.14                       | 0.77                      | 0                             | 0.001                    | -0.15                       |                               |
| AAEL004859        | 0.0001                  | 0.14                       | 0.67                      | 0.02                          | x                        | x                           |                               |
| AAEL013144        | 0.0001                  | 0.14                       | 0.58                      | 0                             | x                        | x                           |                               |
| AAEL000385        | 0.001                   | 0.14                       | 0.057                     | -0.1                          | x                        | x                           |                               |
| AAEL003664        | 0.0001                  | 0.16                       | 0.003                     | -0.05                         | x                        | x                           | binds DENV 3'UTR              |
| AAEL001356        | 0.0001                  | 0.16                       | 0.87                      | 0                             | 0.002                    | -0.11                       |                               |
| AAEL001216        | 0.0001                  | 0.16                       | 0.56                      | 0.01                          | x                        | x                           |                               |
| AAEL004017        | 0.0001                  | 0.16                       | 0.55                      | 0.01                          | x                        | x                           |                               |
| AAEL008100        | 0.002                   | 0.16                       | 0.41                      | -0.03                         | x                        | x                           |                               |
| AAEL010467        | 0.00018                 | 0.16                       | 0.12                      | -0.04                         | x                        | x                           |                               |
| AAEL011150        | 0.004                   | 0.16                       | 0.048                     | -0.12                         | x                        | x                           |                               |
| AAEL005544        | 0.001                   | 0.17                       | 0.003                     | 0.1                           | x                        | x                           |                               |
| AAEL009067        | 0.0001                  | 0.17                       | 0.00037                   | 0.1                           | x                        | x                           |                               |
| AAEL010042        | 0.0001                  | 0.17                       | 0.0001                    | 0.19                          | x                        | x                           |                               |
| AAEL006887        | 0.0001                  | 0.17                       | 0.024                     | 0.08                          | x                        | x                           |                               |
| AAEL014959        | 0.0001                  | 0.17                       | 0.26                      | 0.04                          | x                        | x                           | binds DENV RNA                |
| AAEL012964        | 0.0001                  | 0.17                       | 0.62                      | -0.01                         | x                        | x                           |                               |
| AAEL012980        | 0.00081                 | 0.17                       | 0.93                      | -0.01                         | x                        | x                           |                               |
| AAEL012312        | 0.0001                  | 0.18                       | 0.0001                    | 0.14                          | 0.0001                   | -0.12                       |                               |
| AAEL007042        | 0.0001                  | 0.18                       | 0.83                      | 0.01                          | x                        | x                           |                               |
| AAEL009224        | 0.003                   | 0.18                       | 0.64                      | 0.04                          | x                        | x                           |                               |
| AAEL001350        | 0.0001                  | 0.19                       | 0.001                     | 0.11                          | x                        | x                           |                               |
| AAEL003801        | 0.0001                  | 0.19                       | 0.001                     | 0.15                          | x                        | x                           |                               |
| AAEL008169        | 0.0001                  | 0.19                       | 0.001                     | 0.15                          | x                        | x                           |                               |
| AAEL011925        | 0.0001                  | 0.19                       | 0.0001                    | 0.2                           | x                        | x                           |                               |
| AAEL010340        | 0.0001                  | 0.19                       | 0.32                      | 0.01                          | x                        | x                           |                               |
| AAEL012025        | 0.0001                  | 0.2                        | 0.0001                    | 0.19                          | 0.0015                   | 0.15                        |                               |
| AAEL013116        | 0.0001                  | 0.2                        | 0.0001                    | 0.23                          | x                        | x                           |                               |
| AAEL013771        | 0.00057                 | 0.2                        | 0.0001                    | 0.26                          | x                        | x                           |                               |
| AAEL009217        | 0.00042                 | 0.2                        | 0.18                      | 0.1                           | x                        | x                           |                               |
| AAEL007762        | 0.0001                  | 0.21                       | 0.0001                    | 0.15                          | x                        | x                           |                               |
| AAEL011340        | 0.001                   | 0.21                       | 0.36                      | 0.05                          | x                        | x                           |                               |
| AAEL006876        | 0.00064                 | 0.22                       | 0.002                     | -0.11                         | 0.006                    | -0.28                       |                               |
| AAEL003944        | 0.0001                  | 0.22                       | 0.67                      | 0.02                          | 0.0001                   | -0.26                       |                               |
| AAEL005356        | 0.0001                  | 0.22                       | 0.014                     | 0.11                          | x                        | x                           |                               |
| AAEL010007        | 0.008                   | 0.22                       | 0.43                      | 0.08                          | x                        | x                           |                               |
| AAEL004643        | 0.0001                  | 0.23                       | 0.0001                    | 0.22                          | 0.0001                   | 0.23                        |                               |
| AAEL007565        | 0.0001                  | 0.23                       | 0.0001                    | 0.13                          | 0.014                    | 0.05                        |                               |
| AAEL008257        | 0.0001                  | 0.23                       | 0.003                     | 0.06                          | x                        | x                           | binds DENV RNA                |
| AAEL008601        | 0.0001                  | 0.23                       | 0.0001                    | 0.23                          | x                        | x                           |                               |
| AAEL002832        | 0.001                   | 0.23                       | 0.003                     | -0.21                         | 0.004                    | -0.14                       |                               |
| AAEL012621        | 0.0001                  | 0.23                       | 0.076                     | 0.05                          | 0.001                    | -0.15                       |                               |
| AAEL012826        | 0.0001                  | 0.25                       | 0.12                      | 0.07                          | x                        | x                           |                               |
| AAEL004455        | 0.0001                  | 0.25                       | 0.51                      | -0.04                         | x                        | x                           |                               |
| AAEL002418        | 0.0001                  | 0.26                       | 0.00098                   | 0.27                          | x                        | x                           |                               |
| AAEL003142        | 0.0001                  | 0.26                       | 0.0001                    | 0.18                          | x                        | x                           | binds DENV RNA                |
| AAEL005190        | 0.0001                  | 0.26                       | 0.00037                   | 0.15                          | x                        | x                           | binds DENV RNA                |
| AAEL002083        | 0.0001                  | 0.26                       | 0.027                     | 0.09                          | x                        | x                           |                               |
| AAEL001506        | 0.001                   | 0.27                       | 0.0052                    | 0.2                           | x                        | x                           |                               |
| AAEL011198        | 0.0001                  | 0.28                       | 0.0001                    | 0.16                          | x                        | x                           |                               |
| AAEL003293        | 0.0001                  | 0.3                        | 0.013                     | 0.15                          | x                        | x                           |                               |
| AAEL013075        | 0.0001                  | 0.34                       | 0.4                       | 0.05                          | 0.0001                   | -0.24                       |                               |
| AAEL005515        | 0.009                   | 0.44                       | 0.73                      | -0.03                         | 0.008                    | -1.83                       |                               |

25

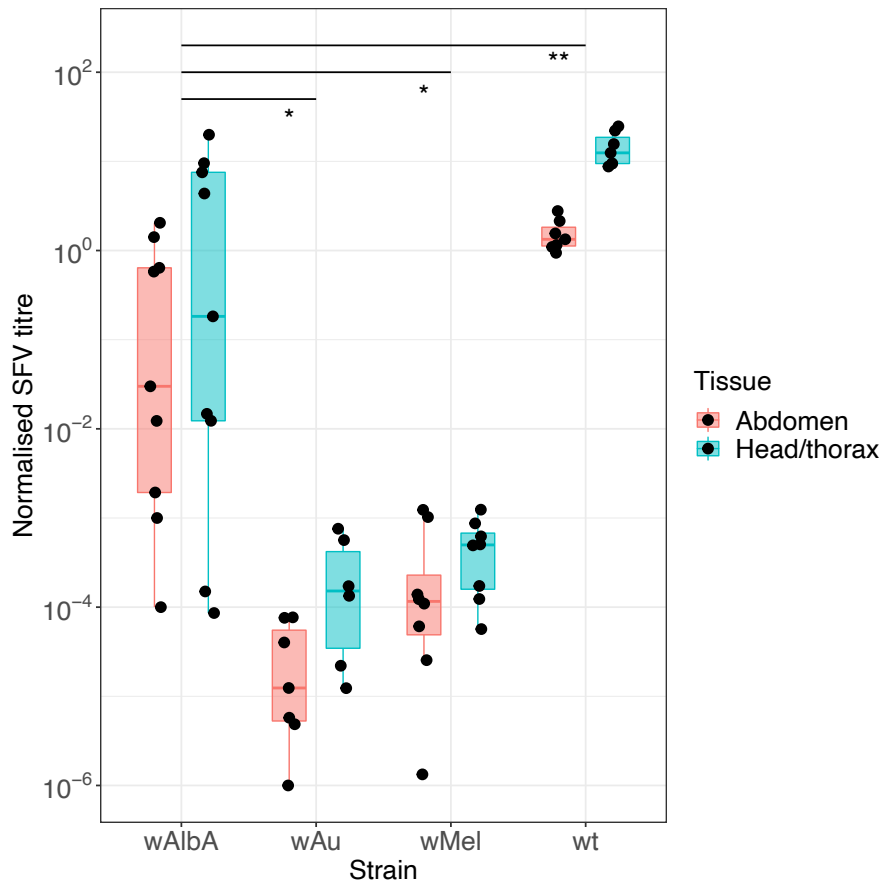

27  
 28  
 29  
 30  
 31  
 32  
 33  
 34  
 35  
 36  
 37  
 38  
 39

**Figure S1 *Wolbachia* inhibition of Semliki Forest virus after infectious blood meal**

Semliki Forest virus (SFV) genome copies per host cell following an infectious blood meal 5 days post adult emergence to *Wolbachia*-containing lines and wild-type *Ae. aegypti*. Females were left for 10 days prior to dissection of the abdomen and head/thorax and total RNA was extracted. Virus quantification was carried out by reverse-transcriptase qPCR with virus levels normalised to host RNA levels using Rps17 as a house-keeping gene. PCR was carried out on cDNA from 9, 7, 8 and 8 females from the wAlbA, wAu, wMel and wt lines respectively. Statistical analysis was performed using a one-way ANOVA with a Dunnett's post-hoc test.

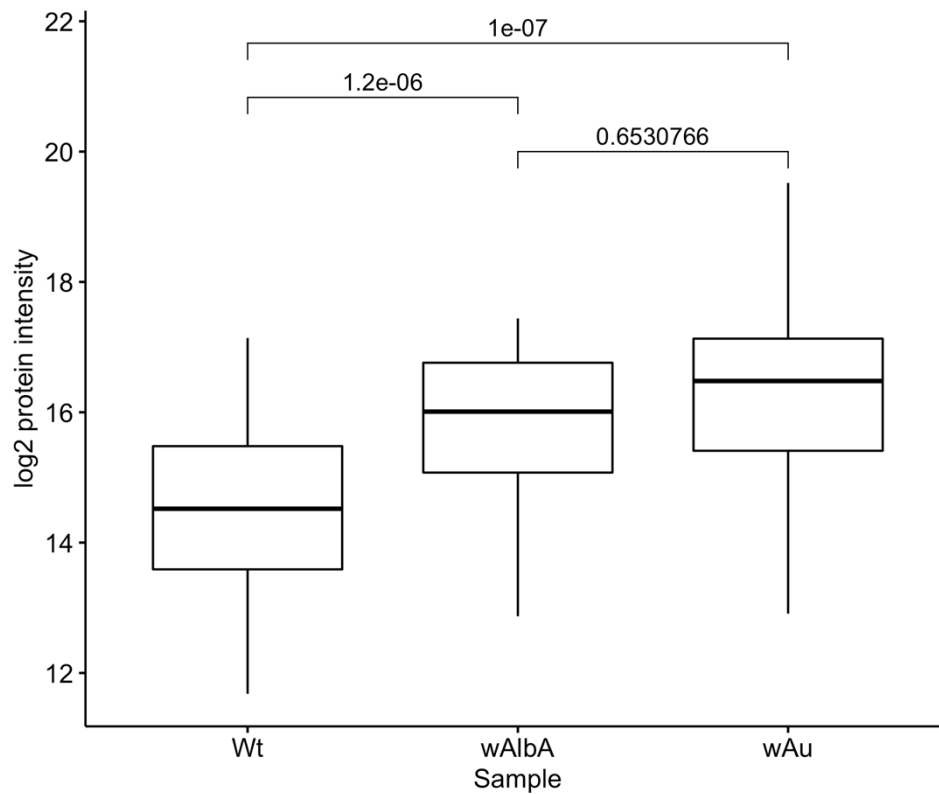

40  
41  
42  
43  
44  
45  
46

**Figure S2 Median intensity of *Wolbachia* proteins in *Aedes aegypti* midguts.** Intensities of TMT reporter ions derived from *Wolbachia* proteins was compared between mosquito lines. *Wolbachia* protein intensity was statistically compared using ANOVA followed by Tukey-HSD test, adjusted p-values are shown for each pairwise comparison. Signal seen in the Wt channel is solely background intensity due to noise/co-isolation of non-*Wolbachia* derived peptides during fragmentation and trace isotopes in the TMT channel.

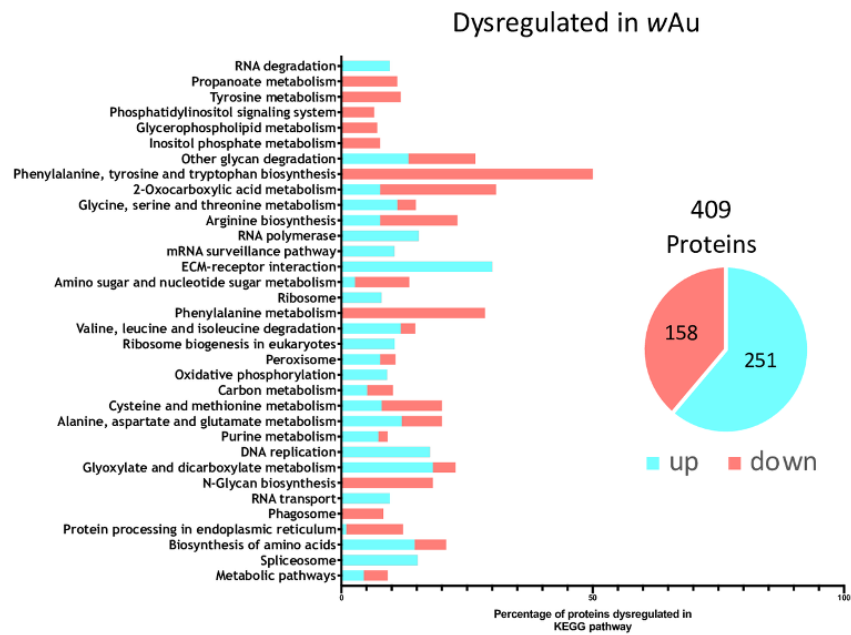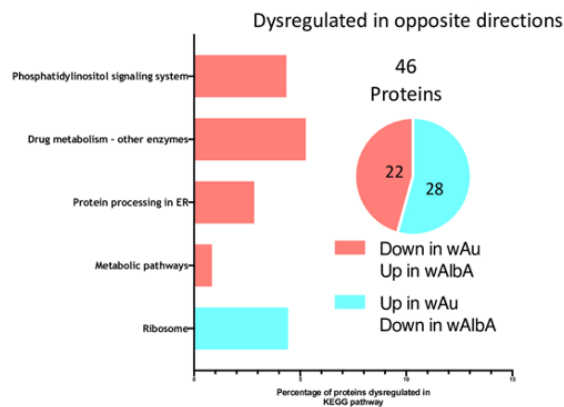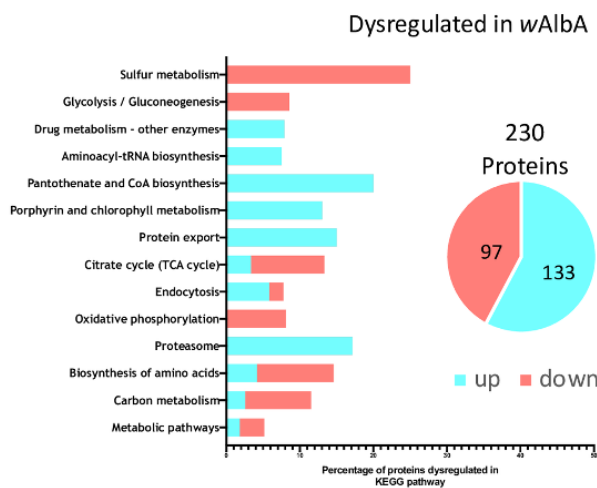

47  
48  
49  
50  
51  
52

**Figure S3 Separation into criteria** Proteins significantly dysregulated between wAu and wAlbA when compared to wt midguts were split into 3 criteria and KEGG pathway analysis carried out in order to determine pathways significantly enriched in each criterion (FDR adjusted p-value <0.05).

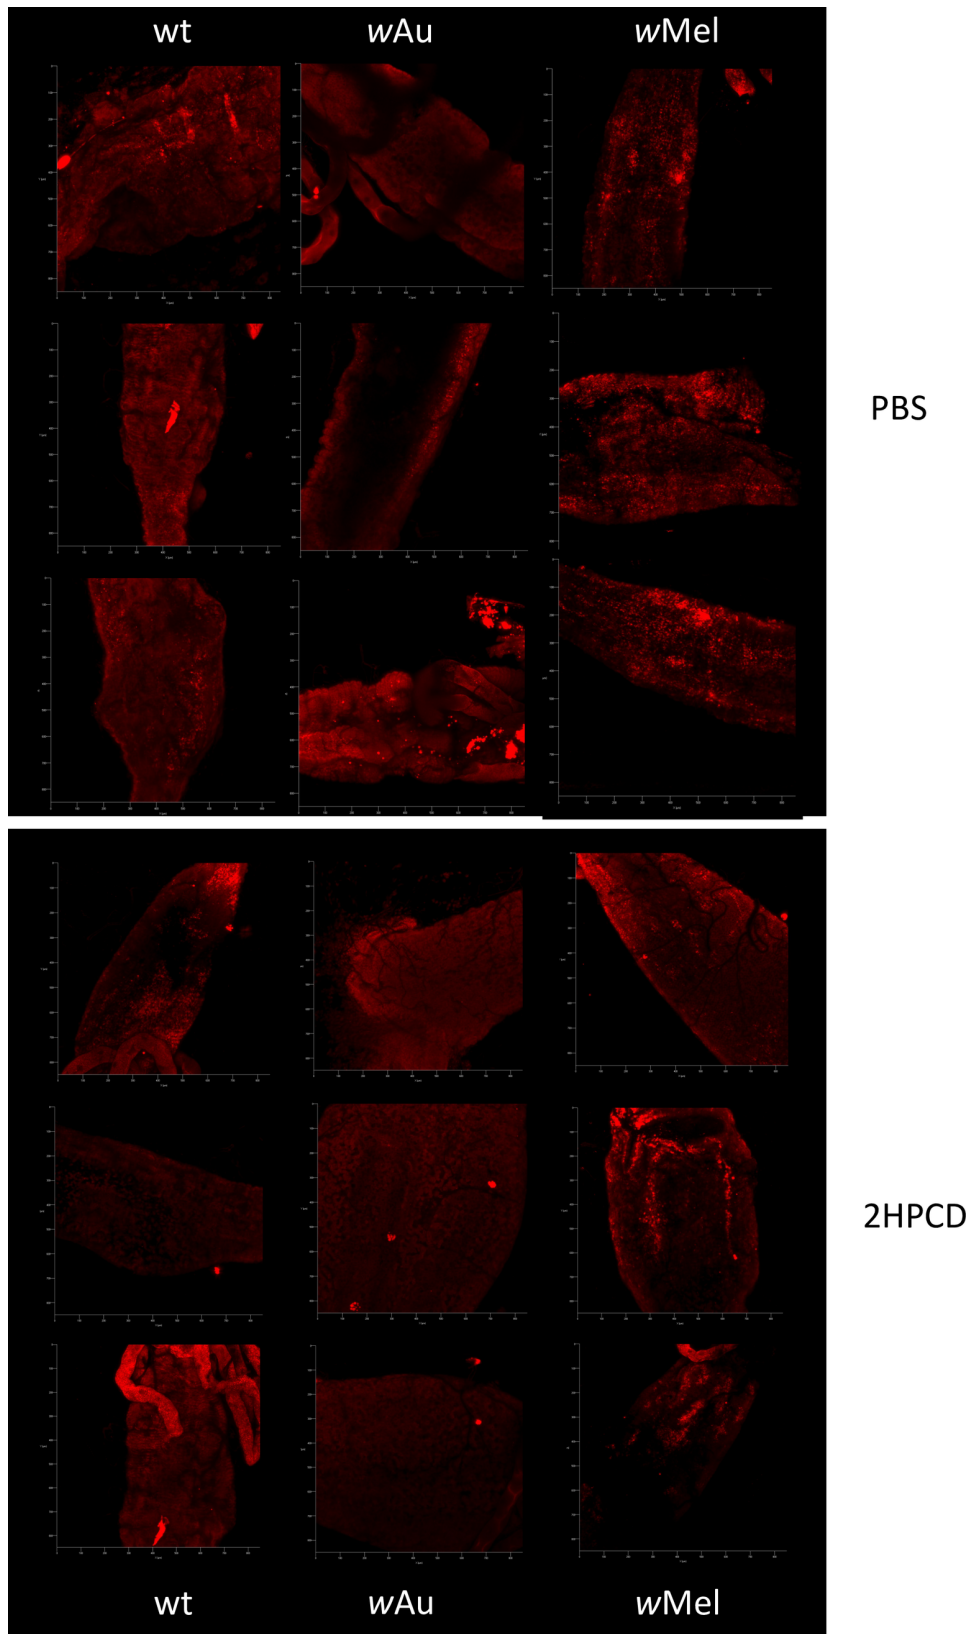

53  
54  
55  
56  
57  
58

**Figure S4 Nile red lipid staining of bloodfed mosquito midguts**

*Aedes aegypti* mosquitoes were injected with 10 mM of 2HPCD or PBS, left to recover for 2 days before a bloodmeal was given. 72hr post bloodmeal midguts were dissected, fixed and stained with Nile red to detect intracellular lipid droplets (distinct punctate staining) For each experiment 3

59 midguts were included and analysed. Figure shows maximum intensity projection of a whole midgut  
60 generated via a Z-stack scan.

61  
62  
63  
64  
65  
66  
67  
68  
69  
70  
71

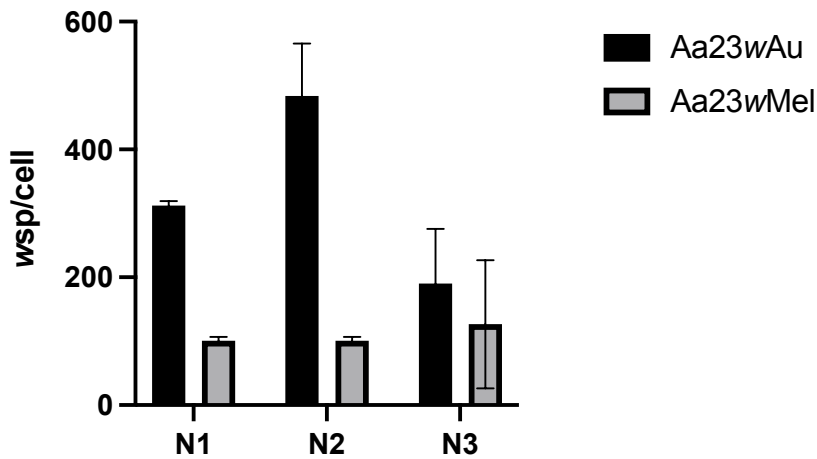

72 **Figure S5 Density of *Wolbachia* in cell lines prior to Zika virus challenge** Density of *Wolbachia*  
73 within cell lines was measured prior to infection with Zika virus. *Wolbachia* quantification was  
74 carried out by qPCR. Levels of target sequence were normalized against the HTH house-keeping  
75 gene. X-axis label corresponds to each of the 3 independent replicates carried out in Zika challenge  
76 experiments. Delta-delta Ct values were used in order to calculate the number of Wolbachia genome  
77 copies per cell.  
78

79  
80  
81  
82  
83  
84  
85
